# Supplementary material for: Acupuncture Relieved Chemotherapy-Induced Peripheral Neuropathy in Patients with Breast Cancer: A Pilot Randomized Sham-Controlled Trial
Source: MDPI journal article supplement (doi:10.3390/jcm10163694), 2021-08-20
Supplement: s1 [file s1]

Supplementary materials

For

**Acupuncture Relieved Chemotherapy-Induced Peripheral  
Neuropathy in Patients with Breast Cancer:A Pilot  
Randomized Sham-controlled Trial**

Chien-Chen Huang, Tsung-Jung Ho, Hsin-Yueh Ho, Pei-Yu Chen, Cheng-Hao Tu, Yu-Chuen

Huang, Yu-Chen Lee, Mao-Feng Sun, Yi-Hung Chen

Figure S1

Figure S2

Figure S3

Table S1

Table S2

Table S3

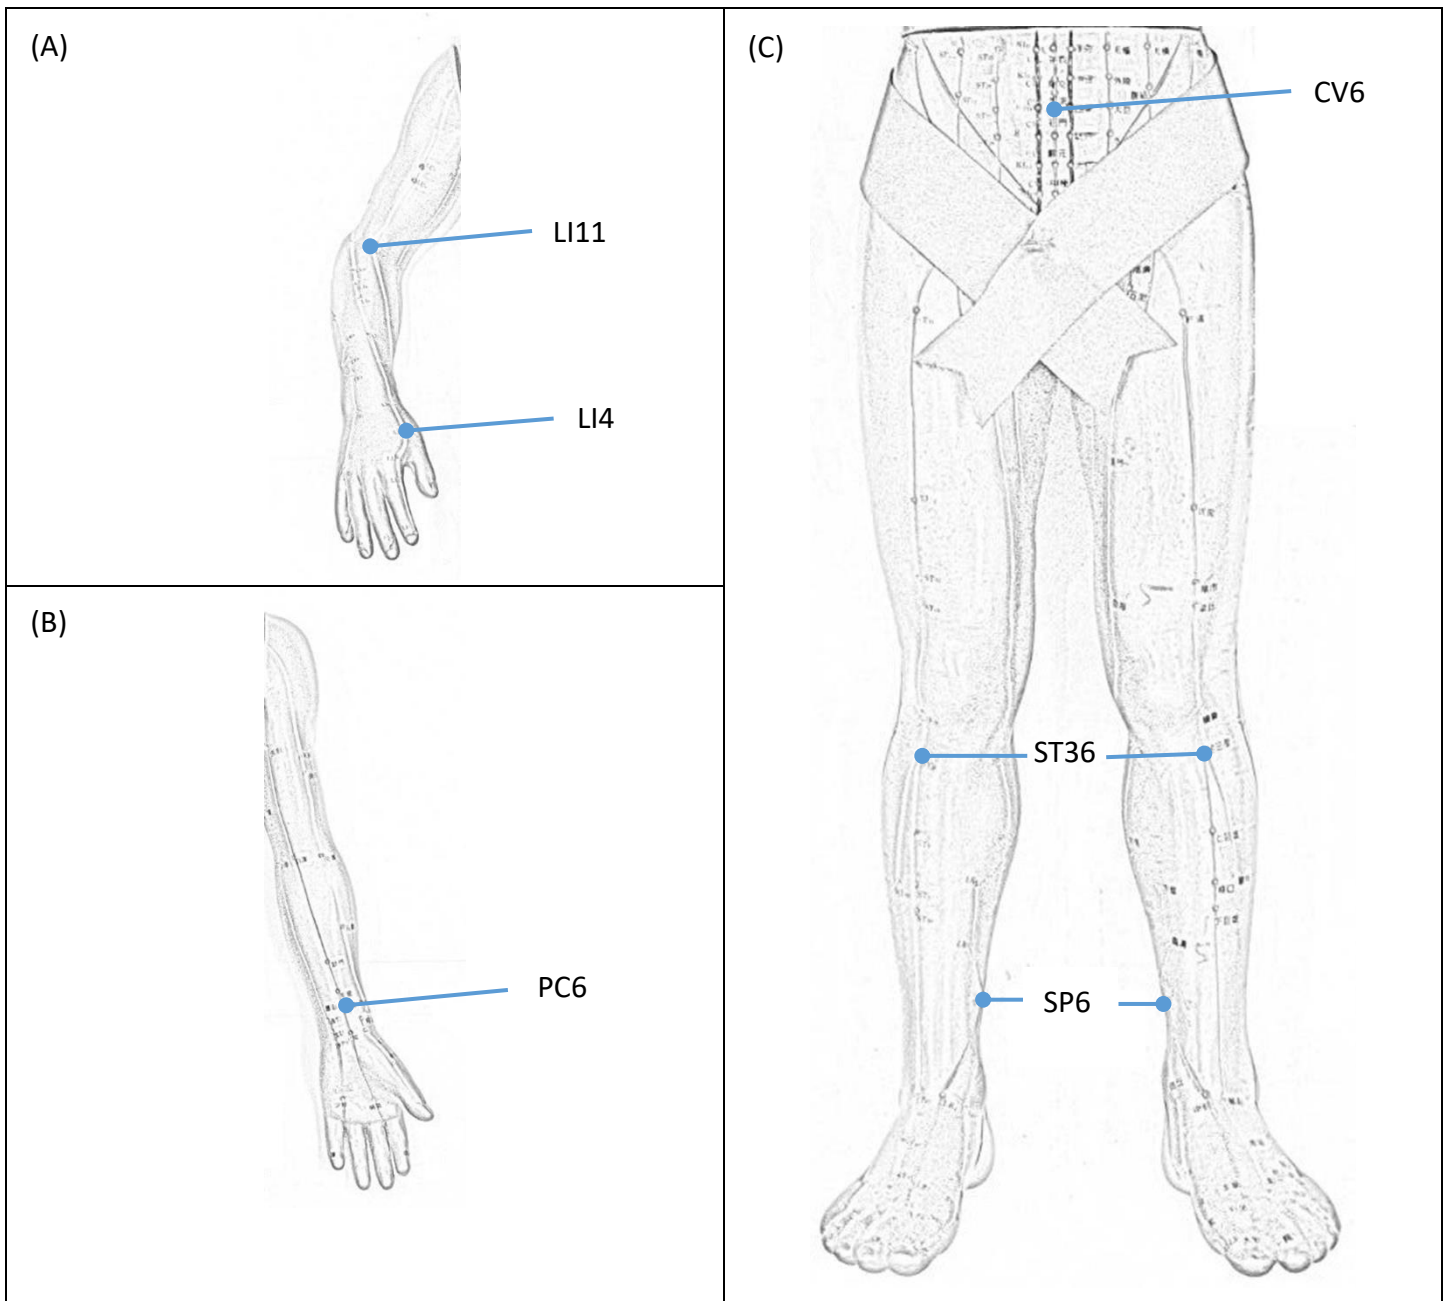

**Figure S1.** Acupuncture point locations: (A) Quchi(LI11), Hegu (LI4), (B) Neiguan (PC6), (C) Qihai (CV6), Zusanli (ST36), and Sanyingjiao (SP6).

(A)

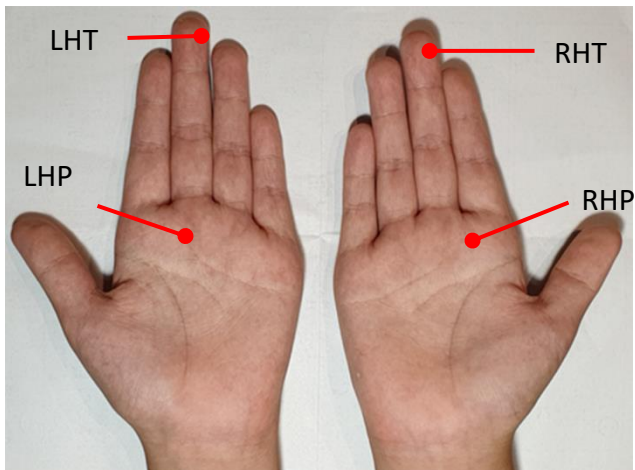

(B)

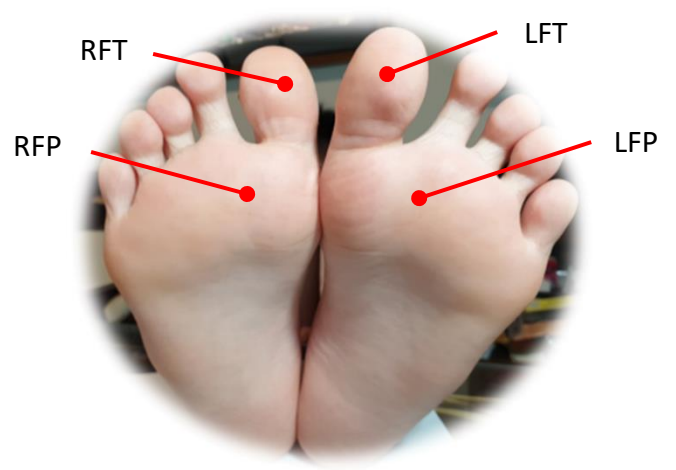

(C)

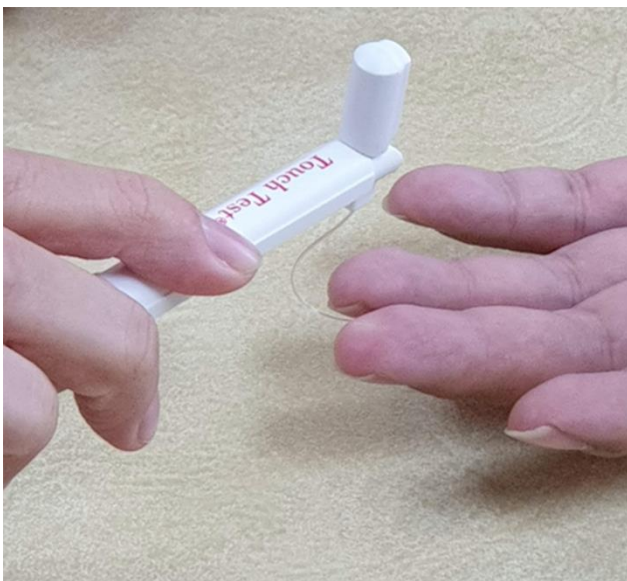

(D)

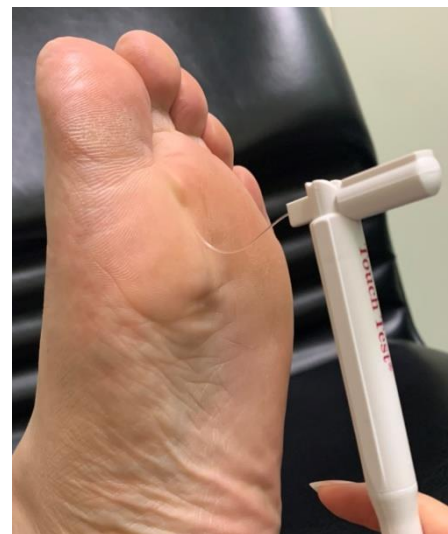

**Figure S2.** Locations where quantitative sensory testing is performed using the Semmes-Weinstein monofilament examination. (A) Middle fingertips and palms (B) Big toe tips and plantars. (C) The touch-press method at hand: press the filament at a 90° angle against the skin until it bows. Hold in place for 1.5 s and then remove (D) The same touch-press method is performed at the foot. Abbreviations: LHT, Left hand's middle fingertip; LHP, Left hand's palm; RHT, Right hand's middle fingertip; RHP, Right hand's palm; LFT, Left foot's big toe tip; LFP, Left foot's plantar; RFT, Right foot's big toe tip; RFP, Right foot's plantar.

(A) **Brief Pain Inventory-Short Form**  
General activity score range:0-10  
Higher scores--> severe symptoms

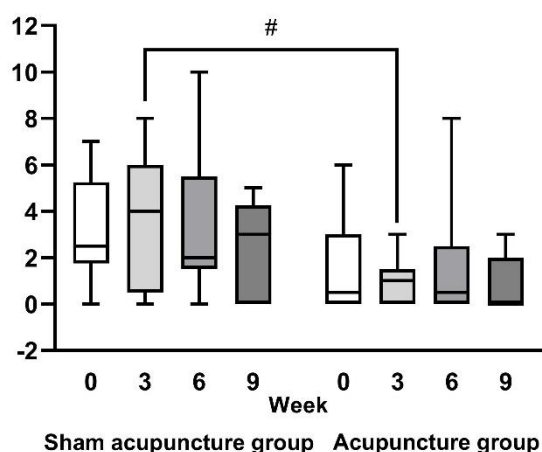

(B) **Brief Pain Inventory-Short Form**  
Mood score range:0-10  
Higher scores--> severe symptoms

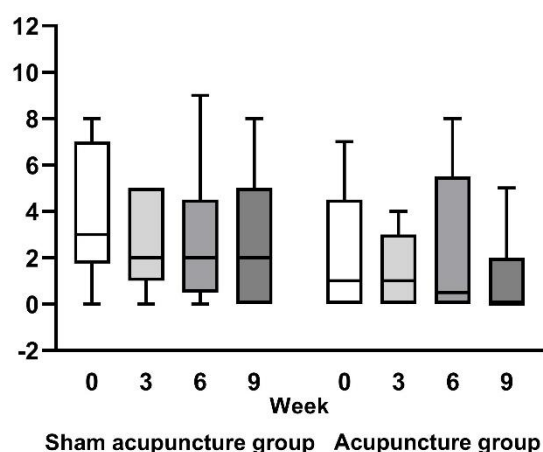

(C) **Brief Pain Inventory-Short Form**  
Walking ability score range:0-10  
Higher scores--> severe symptoms

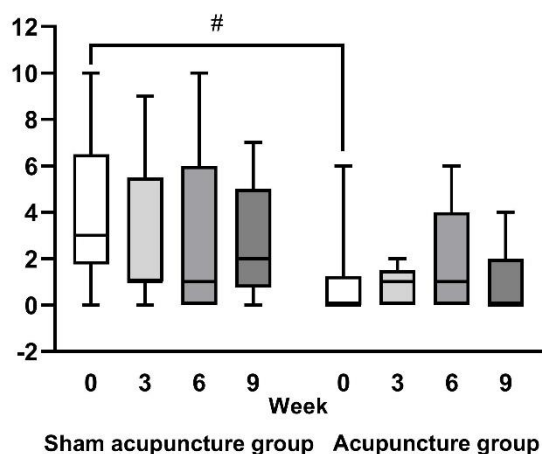

(D) **Brief Pain Inventory-Short Form**  
Normal work score range:0-10  
Higher scores--> severe symptoms

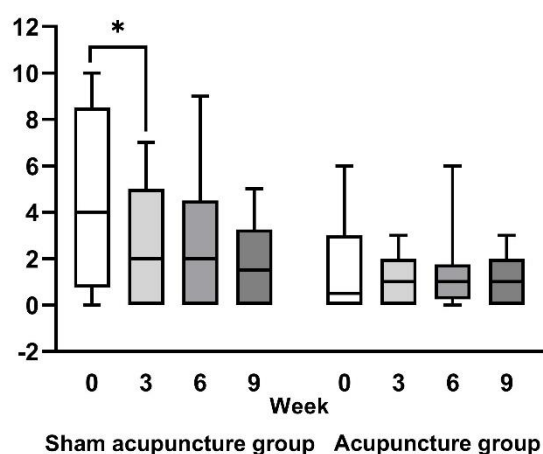

(E) **Brief Pain Inventory-Short Form**  
Relations with other people score range:0-10  
Higher scores--> severe symptoms

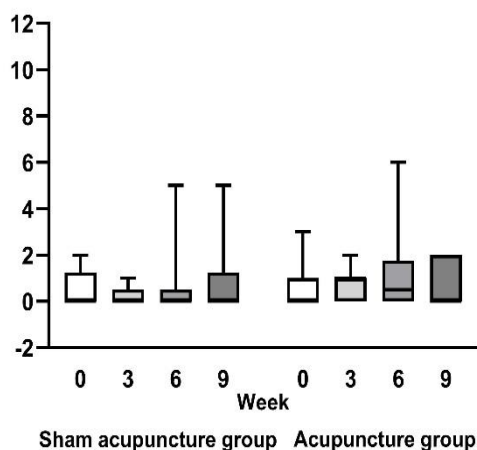

(F) **Brief Pain Inventory-Short Form**  
Sleep score range:0-10  
Higher scores--> severe symptoms

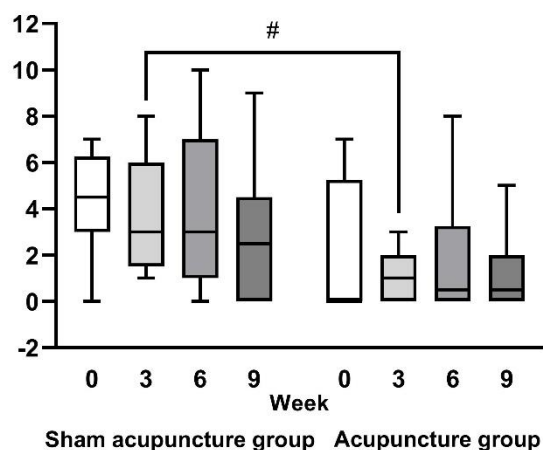

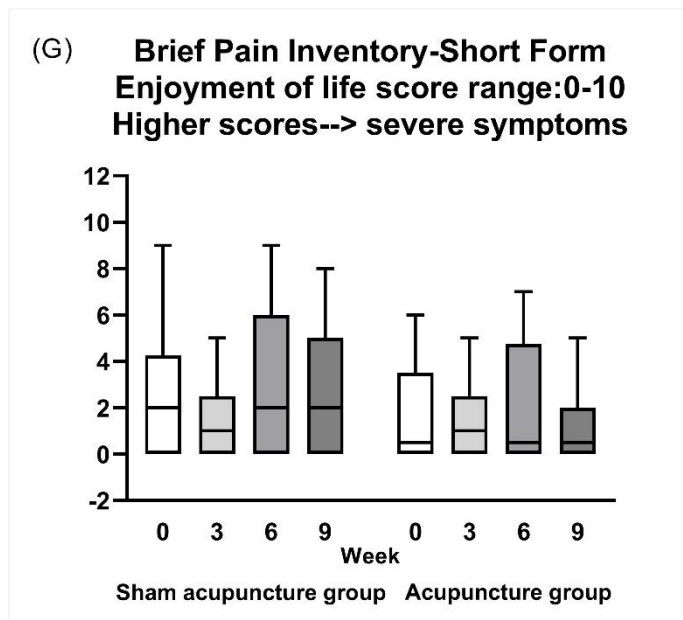

**Figure S3.** (A) to (G) reveal pain interference scores in the BPI-SF during the treatment period. Data are expressed as mean± standard error of the mean (SEM). \* $p < 0.05$ , Wilcoxon signed-rank test # $p < 0.05$ , after applying the Mann-Whitney  $U$  test. Abbreviations: BPI-SF, brief pain inventory short form.

**Table S1.** Results of patient-reported outcome in the Brief Pain Inventory-Short Form

| Brief Pain Inventory-<br>Short Form | Acupuncture group |             |                                | Sham acupuncture group |             |                                | Mann-<br>Whitney <i>U</i><br>test<br><i>p</i> -value |
|-------------------------------------|-------------------|-------------|--------------------------------|------------------------|-------------|--------------------------------|------------------------------------------------------|
|                                     | N                 | Mean(SD)    | Wilcoxon signed                | N                      | Mean(SD)    | Wilcoxon signed                |                                                      |
|                                     |                   |             | ranks test <i>p</i> -<br>Value |                        |             | ranks test <i>p</i> -<br>Value |                                                      |
| Average pain severity               |                   |             |                                |                        |             |                                |                                                      |
| Baseline                            | 10                | 3.10(2.33)  |                                | 10                     | 3.10(1.79)  |                                | 0.974                                                |
| Week 3                              | 9                 | 1.72(1.48)  | 0.172                          | 10                     | 3.50(2.27)  | 0.781                          | 0.078                                                |
| Week 6                              | 8                 | 1.63(0.92)  | 0.063                          | 9                      | 2.78(2.82)  | 1.000                          | 0.679                                                |
| Week 9                              | 8                 | 0.88(1.13)  | 0.031*                         | 10                     | 2.70(2.00)  | 0.508                          | 0.039*                                               |
| Changes at week 6                   | 8                 | -1.63(1.85) |                                | 9                      | -0.11(2.71) |                                | 0.288                                                |
| Changes at week 9                   | 8                 | -2.38(2.39) |                                | 10                     | -0.40(2.07) |                                | 0.078                                                |
| General activity                    |                   |             |                                |                        |             |                                |                                                      |
| Baseline                            | 10                | 1.40(2.01)  |                                | 10                     | 3.30(2.31)  |                                | 0.059                                                |
| Week 3                              | 9                 | 0.89(1.05)  | 0.688                          | 9                      | 3.56(2.88)  | 0.766                          | 0.044*                                               |
| Week 6                              | 8                 | 1.63(2.77)  | 1.000                          | 9                      | 3.33(3.12)  | 1.000                          | 0.105                                                |
| Week 9                              | 8                 | 0.88(1.25)  | 0.625                          | 10                     | 2.60(2.01)  | 0.465                          | 0.063                                                |
| Changes at week 6                   | 8                 | 0.00(3.02)  |                                | 9                      | 0.22(1.86)  |                                | 0.881                                                |
| Changes at week 9                   | 8                 | -0.75(2.31) |                                | 10                     | -0.70(2.11) |                                | 0.384                                                |
| Mood                                |                   |             |                                |                        |             |                                |                                                      |
| Baseline                            | 10                | 2.20(2.66)  |                                | 10                     | 3.60(2.76)  |                                | 0.190                                                |

|                                    |    |             |       |    |             |        |        |
|------------------------------------|----|-------------|-------|----|-------------|--------|--------|
| Week 3                             | 9  | 1.33(1.66)  | 1.000 | 9  | 2.78(2.05)  | 0.109  | 0.123  |
| Week 6                             | 8  | 2.13(3.36)  | 1.000 | 9  | 2.78(3.11)  | 0.688  | 0.267  |
| Week 9                             | 8  | 1.13(1.81)  | 0.625 | 10 | 2.60(2.80)  | 0.203  | 0.306  |
| Changes at week 6                  | 8  | 0.25(3.62)  |       | 9  | -0.44(2.70) |        | 0.520  |
| Changes at week 9                  | 8  | -0.75(2.96) |       | 10 | -1.00(2.58) |        | 0.556  |
| <b>Walking ability</b>             |    |             |       |    |             |        |        |
| Baseline                           | 10 | 1.00(1.89)  |       | 10 | 3.80(3.19)  |        | 0.008* |
| Week 3                             | 9  | 0.78(0.83)  | 1.000 | 9  | 3.22(3.11)  | 0.406  | 0.078  |
| Week 6                             | 8  | 1.75(2.38)  | 0.750 | 9  | 3.11(3.62)  | 0.641  | 0.585  |
| Week 9                             | 8  | 1.00(1.51)  | 0.938 | 10 | 2.70(2.45)  | 0.426  | 0.092  |
| Changes at week 6                  | 8  | 0.50(3.38)  |       | 9  | 0.00(3.39)  |        | 0.258  |
| Changes at week 9                  | 8  | -0.25(2.55) |       | 10 | -1.10(3.60) |        | 0.395  |
| <b>Normal work</b>                 |    |             |       |    |             |        |        |
| Baseline                           | 10 | 1.40(2.01)  |       | 10 | 4.50(3.89)  |        | 0.061  |
| Week 3                             | 9  | 1.22(1.09)  | 1.000 | 9  | 2.56(2.60)  | 0.031* | 0.374  |
| Week 6                             | 8  | 1.50(1.93)  | 0.844 | 9  | 2.67(2.96)  | 0.156  | 0.423  |
| Week 9                             | 8  | 1.13(1.25)  | 0.625 | 10 | 1.80(1.75)  | 0.070  | 0.457  |
| Changes at week 6                  | 8  | -0.25(3.11) |       | 9  | -1.44(2.96) |        | 0.309  |
| Changes at week 9                  | 8  | -0.63(1.85) |       | 10 | -2.70(4.11) |        | 0.189  |
| <b>Relations with other people</b> |    |             |       |    |             |        |        |
| Baseline                           | 10 | 0.50(0.97)  |       | 10 | 0.50(0.85)  |        | 1.000  |
| Week 3                             | 9  | 0.67(0.71)  | 1.000 | 9  | 0.22(0.44)  | 0.500  | 0.253  |
| Week 6                             | 8  | 1.25(2.05)  | 0.750 | 9  | 0.67(1.66)  | 1.000  | 0.310  |
| Week 9                             | 8  | 0.75(1.04)  | 0.750 | 10 | 1.00(2.11)  | 0.500  | 0.725  |
| Changes at week 6                  | 8  | 0.63(2.07)  |       | 9  | 0.11(1.17)  |        | 0.660  |
| Changes at week 9                  | 8  | 0.13(1.46)  |       | 10 | 0.50(1.35)  |        | 0.903  |
| <b>Sleep</b>                       |    |             |       |    |             |        |        |
| Baseline                           | 10 | 1.90(2.88)  |       | 10 | 4.30(2.16)  |        | 0.071  |
| Week 3                             | 9  | 1.00(1.12)  | 0.406 | 9  | 3.56(2.55)  | 0.516  | 0.014* |
| Week 6                             | 8  | 1.75(2.87)  | 0.750 | 9  | 3.78(3.49)  | 1.000  | 0.157  |
| Week 9                             | 8  | 1.25(1.75)  | 0.625 | 10 | 2.80(2.94)  | 0.078  | 0.235  |
| Changes at week 6                  | 8  | -0.63(3.58) |       | 9  | -0.22(2.33) |        | 0.831  |
| Changes at week 9                  | 8  | -1.13(3.14) |       | 10 | -1.50(2.22) |        | 0.577  |
| <b>Enjoyment of life</b>           |    |             |       |    |             |        |        |
| Baseline                           | 10 | 1.60(2.27)  |       | 10 | 2.60(2.84)  |        | 0.386  |
| Week 3                             | 9  | 1.33(1.73)  | 0.531 | 9  | 1.44(1.67)  | 0.391  | 0.837  |
| Week 6                             | 8  | 1.88(2.90)  | 1.000 | 9  | 3.00(3.28)  | 0.563  | 0.366  |
| Week 9                             | 8  | 1.25(1.75)  | 0.688 | 10 | 2.50(2.68)  | 0.590  | 0.310  |
| Changes at week 6                  | 8  | -0.13(3.72) |       | 9  | 1.11(3.41)  |        | 0.615  |
| Changes at week 9                  | 8  | -0.75(3.06) |       | 10 | -0.10(3.51) |        | 0.985  |

\*p < 0.05. \*\*p < 0.01. Data are analyzed by Wilcoxon signed ranks test and Mann-Whitney U test.

| Touch-Pressure<br>perception<br>threshold (grams) | Acupuncture group |               |                                                   | Sham acupuncture group |              |                                                  | Mann-Whitney <i>U</i><br>test<br><i>p</i> -value |
|---------------------------------------------------|-------------------|---------------|---------------------------------------------------|------------------------|--------------|--------------------------------------------------|--------------------------------------------------|
|                                                   | N                 | Mean(SD)      | Wilcoxon signed<br>ranks test <i>p</i> -<br>value | N                      | Mean(SD)     | Wilcoxon<br>signed ranks<br>test <i>p</i> -value |                                                  |
|                                                   |                   |               |                                                   |                        |              |                                                  |                                                  |
| <b>LHT</b>                                        |                   |               |                                                   |                        |              |                                                  |                                                  |
| Baseline                                          | 10                | 1.64(1.87)    |                                                   | 10                     | 1.62(1.41)   |                                                  | 0.836                                            |
| Post-Tx                                           | 8                 | 0.41(0.66)    | 0.055                                             | 10                     | 1.82(2.28)   | 0.531                                            | 0.043*                                           |
| Changes at post-Tx                                | 8                 | -1.54(2.12)   |                                                   | 10                     | 0.20(2.51)   |                                                  | 0.049*                                           |
| <b>LHP</b>                                        |                   |               |                                                   |                        |              |                                                  |                                                  |
| Baseline                                          | 10                | 2.60(4.69)    |                                                   | 10                     | 1.98(2.89)   |                                                  | 0.440                                            |
| Post-Tx                                           | 8                 | 0.25(0.23)    | 0.008**                                           | 10                     | 1.44(1.99)   | 0.297                                            | 0.214                                            |
| Changes at post-Tx                                | 8                 | -2.92(5.20)   |                                                   | 10                     | -0.54(1.73)  |                                                  | 0.325                                            |
| <b>RHT</b>                                        |                   |               |                                                   |                        |              |                                                  |                                                  |
| Baseline                                          | 10                | 1.52(1.35)    |                                                   | 10                     | 1.74(1.31)   |                                                  | 0.505                                            |
| Post- Tx                                          | 8                 | 0.37(0.29)    | 0.008**                                           | 10                     | 1.25(1.78)   | 0.102                                            | 0.158                                            |
| Changes at post-Tx                                | 8                 | -1.43(1.37)   |                                                   | 10                     | -0.50(2.20)  |                                                  | 0.262                                            |
| <b>RHP</b>                                        |                   |               |                                                   |                        |              |                                                  |                                                  |
| Baseline                                          | 10                | 2.50(4.53)    |                                                   | 10                     | 1.91(1.85)   |                                                  | 0.540                                            |
| Post- Tx                                          | 8                 | 0.28(0.20)    | 0.031*                                            | 10                     | 1.27(1.77)   | 0.078                                            | 0.049*                                           |
| Changes at post-Tx                                | 8                 | -2.75(5.06)   |                                                   | 10                     | -0.64(1.13)  |                                                  | 0.262                                            |
| <b>LFT</b>                                        |                   |               |                                                   |                        |              |                                                  |                                                  |
| Baseline                                          | 10                | 14.02(30.57)  |                                                   | 10                     | 10.30(17.99) |                                                  | 0.961                                            |
| Post- Tx                                          | 8                 | 2.50(2.49)    | 0.117                                             | 10                     | 3.50(3.41)   | 0.219                                            | 0.498                                            |
| Changes at post-Tx                                | 8                 | -14.87(34.46) |                                                   | 10                     | -6.80(16.04) |                                                  | 0.531                                            |
| <b>LFP</b>                                        |                   |               |                                                   |                        |              |                                                  |                                                  |
| Baseline                                          | 10                | 20.66(56.17)  |                                                   | 10                     | 9.61(18.09)  |                                                  | 0.492                                            |
| Post- Tx                                          | 8                 | 2.35(5.13)    | 0.047*                                            | 10                     | 3.24(4.60)   | 0.055                                            | 0.344                                            |
| Changes at post-Tx                                | 8                 | -23.40(57.43) |                                                   | 10                     | -6.36(13.99) |                                                  | 0.880                                            |
| <b>RFT</b>                                        |                   |               |                                                   |                        |              |                                                  |                                                  |
| Baseline                                          | 10                | 12.80(17.30)  |                                                   | 10                     | 5.28(7.55)   |                                                  | 0.083                                            |
| Post- Tx                                          | 8                 | 2.43(2.94)    | 0.039*                                            | 10                     | 4.94(4.71)   | 0.922                                            | 0.194                                            |
| Changes at post-Tx                                | 8                 | -12.45(19.99) |                                                   | 10                     | -0.34(7.15)  |                                                  | 0.041*                                           |
| <b>RFP</b>                                        |                   |               |                                                   |                        |              |                                                  |                                                  |

|                    |    |             |        |    |              |       |       |
|--------------------|----|-------------|--------|----|--------------|-------|-------|
| Baseline           | 10 | 6.46(6.53)  |        | 10 | 9.36(18.01)  |       | 0.954 |
| Post- Tx           | 8  | 2.87(5.06)  | 0.031* | 10 | 3.94(3.77)   | 0.539 | 0.390 |
| Changes at post-Tx | 8  | -4.93(6.11) |        | 10 | -5.41(15.95) |       | 0.264 |

*Note:* Data are presented as mean(S.D.). *Abbreviations:* S.D., standard deviation; LHT, Left hand's middle fingertip; LHP, Left hand's palm; RHT, Right hand's middle fingertip; RHP, Right hand's palm; LFT, Left foot's big toe tip; LFP, Left foot's plantar; RFT, Right foot's big toe tip; RFP, Right foot's plantar; Tx, treatment.

\*p < 0.05. \*\*p < 0.01. Data are analyzed by Wilcoxon signed ranks test and Mann-Whitney *U* test.

**Table S3.** Results of patient-reported outcome in the WHOQOL-BREF(Taiwan version)

| Four domains in WHOQOL-BREF | Acupuncture group |              |                               | Sham acupuncture group |              |                               | Two sample T test <i>p</i> -value |
|-----------------------------|-------------------|--------------|-------------------------------|------------------------|--------------|-------------------------------|-----------------------------------|
|                             | N                 | Mean(SD)     | Paired t Test <i>p</i> -Value | N                      | Mean(SD)     | Paired t Test <i>p</i> -Value |                                   |
| Physical health             |                   |              |                               |                        |              |                               |                                   |
| Baseline                    | 10                | 60.80(15.97) |                               | 10                     | 55.20(12.69) |                               | 0.397                             |
| Post-Tx                     | 8                 | 60.88(17.88) | 0.473                         | 10                     | 59.50(11.34) | 0.335                         | 0.845                             |
| Changes at post-Tx          | 8                 | 3.63(13.52)  |                               | 10                     | 4.30(13.36)  |                               | 0.917                             |
| Psychological               |                   |              |                               |                        |              |                               |                                   |
| Baseline                    | 10                | 51.40(13.79) |                               | 10                     | 45.20(16.58) |                               | 0.375                             |
| Post-Tx                     | 8                 | 55.50(18.62) | 0.185                         | 10                     | 52.50(13.52) | 0.020*                        | 0.697                             |
| Changes at post-Tx          | 8                 | 6.13(11.79)  |                               | 10                     | 7.30(8.14)   |                               | 0.806                             |
| Social relationships        |                   |              |                               |                        |              |                               |                                   |
| Baseline                    | 10                | 62.10(9.56)  |                               | 10                     | 54.50(10.22) |                               | 0.103                             |
| Post- Tx                    | 8                 | 68.00(11.15) | 0.085                         | 10                     | 58.90(10.80) | 0.272                         | 0.099                             |
| Changes at post-Tx          | 8                 | 6.88(9.69)   |                               | 10                     | 4.40(11.90)  |                               | 0.641                             |
| Environment                 |                   |              |                               |                        |              |                               |                                   |
| Baseline                    | 10                | 61.90(8.20)  |                               | 10                     | 61.40(13.02) |                               | 0.919                             |
| Post- Tx                    | 8                 | 61.75(10.33) | 0.704                         | 10                     | 66.30(11.84) | 0.191                         | 0.405                             |
| Changes at post-Tx          | 8                 | -1.63(11.60) |                               | 10                     | 4.90(10.97)  |                               | 0.239                             |

*Note:* Data are presented as mean(S.D.). *Abbreviations:* S.D., standard deviation; WHOQOL: World Health Organization Quality of Life Scale; Tx, treatment.

\*p < 0.05. Data are analyzed by paired *t*-test and two-sample *t*-test.
